# Supplementary material for: Phase and morphological transitions of titania/titanate nanostructures from an acid to an alkali hydrothermal environment
Source: Royal Society of Chemistry journal article supplement (doi:10.1039/c2ta00755j), 2012-11-16
Supplement: c2ta00755j.pdf [file c2ta00755j.pdf]

## Electronic Supplementary Information

# Phase and Morphological Transitions of Titania/Titanate Nanostructures from Acid to Alkali Hydrothermal Environment

Bin Zhao,<sup>\*a</sup> Lin Lin<sup>a</sup> and Dannong He <sup>\*a,b</sup>

<sup>a</sup>*National Engineering Research Center for Nanotechnology, 28 East Jiangchuan Road, Min Hang  
District, Shanghai CA-200241, P.R. China. E-mail: zhaobinwily@hotmail.com. Fax: +86-21-34291125.*

*Tel: +86-21-34291286.*

<sup>b</sup>*School of Materials Science and Engineering, Shanghai JiaoTong University, 800 Dongchuan Road,  
Min Hang District, Shanghai CA-200240, P.R. China.*

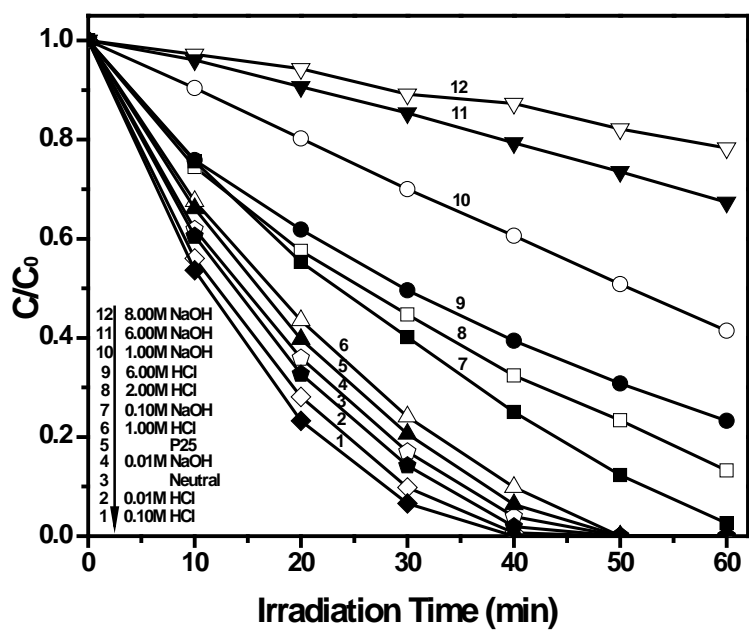

**Fig. S1** Photocatalytic degradation of MO with titania/titanate nanomaterials under UV irradiation.

Catalysts were denoted by HCl/NaOH concentration.
